# Supplementary material
Source: Springer Nature journal article supplement (https://www.springermedizin.de/resource/supplementary/13000_2013_779_MOESM1_ESM.pdf/9625482)

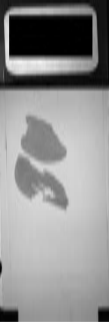

(a)

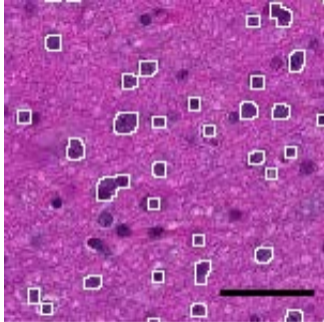

(b)

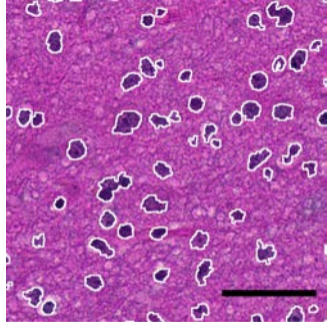

(c)

Supplement: MOESM1 [file 9625482]
